# Supplementary material for: Reprogramming of pancreatic exocrine cells towards a beta (β) cell character using Pdx1, Ngn3 and MafA
Source: PubMed Central journal article supplement — Biochem J. 2012 Feb 24;442(Pt 3):539–50. doi: 10.1042/BJ20111678 (PMC3286861; doi:10.1042/bj20111678), 2012-02-24
Supplement: bj4420539add.pdf [file bj4420539add.pdf]

**SUPPLEMENTARY ONLINE DATA**

**Reprogramming of pancreatic exocrine cells towards a beta cell character using *Pdx1*, *Ngn3* and *MafA***

Ersin AKINCI, Anannya BANGA, Lucas V. GREDER, James R. DUTTON and Jonathan M. W. SLACK<sup>1</sup>

Stem Cell Institute, University of Minnesota, MTRF, 2001 6th Street SE, Minneapolis, MN 55455, U.S.A.

***Pdx1*:**

AGAGATCAGCCTGCTGAGAGAGAA AATTGAAA(CAAGTGCAGGTG)TTCGCGGGGCCTGGGC  
 CTCC(TTCTTAAGG)CAGGGCCAGG(CCAAT)GGTGGCCCCAGGCTGAA(CCACGTG)GGGTGC  
 CTCAGAGCCTATGGCACGGCGACCGGCTTCTGTCTCTCGCCAGCCTGTGGTTCGCCGGGA  
 (GAGCA)GTGGAGAAGTGTCAAAGCGATCTGGGGTGGCGCTGAGAGTCCGTGAGCTGCCAG  
 CGCCTAAGGCCTGGCTGTAGCTCCCTACCCGGGCTGCCGGCCCCGAAGTGCCCGGTGCC  
 ACCATGAATAGTGAGGAGCAGTA CTACGCGGCCACACAGCTCTACAAGGACCCGTGCGCAT  
 TCCAGAGGGGTCCGGTGCCAGAGTTCAGTGTAATCCCCCTGCGTGCCTGTACATGGGCCG  
 CCAGCCCCACCTCCGCCGCCACCCAGTTTGCAGGCTCGCTGGGAAACGCTGGAACAGGGA  
 AGTCCCCGGACATCTCCCATA CGAAGTGCCCCCGCTCGCCGATGACCCGGCTGGCGCG  
 ACCTCCACCACCTCCAGCTCAGCTCGGGCTCGCCATCCACCTCCCGGACCTTCCCG  
 AATGGAACCGAGACTGGGGCCTGGAAGAGCCAGCCGCGTTTATCTCCCTTCCCGTGA  
 TGAAATCCACAAAGCTCACGCGTGAAAAGCCAGTGGGCAG

***Ins1*:**

AATAATC(TAATTA)CCCTAGGTCTAAGTAGAGTTGT(TGACGT(C)CAAT)GAGCGCTTTCTGC  
 AGACTTAGCACTAGGCAAGTGT(TGAAAT)(TACAGCTTACGCC)CCTCTCG(CATCTG)CC  
 TACTACCCCTCTAGAGCCC(TTAAT)GGGCCAA(ACGGCAAAGTCC)AGGGGGCAGAGAGG  
 AGGTGCTTTGGAC(TATAA)AGCTAGTGGAGACCCAGTAACTCCCAACCCTAAGTGACCAGCT  
 ACAATCATAGACCATCAGCAAGCAGGTATGTA CTCTCTGGGTGAGCCCGTTCCCCAGCC  
 AAAACTCTAGGGACTTTAGGAAGGATGTGGGTCTCTCTTACATGGACCTTTCTCTAGCC  
 AACCTGCTATCTCCAGGTCATTGTTC AACATGGCCCTGTGGATGCGCTTCCCTGCCCTC  
 CTGGCCCTGCTCGTCTCTGGGAGCCCAAGCCTGCCAGGCTTTTGTCAAACAGCACCTTTG  
 TGGTCTCACCTGGTGGAGGCTCTGTACCTGGTGTGTGGGAAACGTTGGTTCTTCTACACAC  
 CCAAGTCCCGTCTGTAAGTGGAGGACCCGCAAGTGCCACAACCTGGAGCTGGGTGGAGGCC  
 CGGAGGCCGGGGATCTTACAGCCTTGGCACTGGAGGTTGCCCGGCAAGCGTGGCATTGT  
 GGATCAGTCTGCACCAGCATCTGTCCCTTACCAACTGGAGA ACTACTGCAACTGA

***Ins2*:**

AGCAAGGCCCTCTGGCTTCTCTATGGTCTGAGGAGACCTCTCCACACTGCCCTGGTCTTCCC  
 ACCCTGGTCTACCTGAGCTCCTTACCTGCTCCTCTTGCATTACGATCTTCTGCTACAG  
 TAGGTCCACGGTGGTGTCCAGATACCCGGAGTGTGAGTGGCTGCAGCACTTTCTGGGGGA  
 CAAGAAGTAGGGAGCAAGGGGCTCACAGTCAAGTCTGGTGGCTATAAAGCCCTGCATAGG  
 GTAGAGTTCTCGCTCATGCAACGACACCAAGGGTTTTGCTGTCTGCTCGGGGAACAGGGC  
 AGTACCAAATCAGGAACAGAAAGAGTCAAGGATCCCCAACCCTCAAGTGGAGGCTGAG  
 AAAGTTTTGTAGCTGGGTAGAGTATGTA ACTAAGAGATGGAGACAGCTGGCTCTGAGCTCTG  
 AAGCAAGCACCTTATGGAGAGTTGTGACCTTCAGGTGCAAACTAAGATACTACAGGAG  
 AATACACCATGGGGCTTACGCCAGTTGACTCCCGAGTGGGCTATGGGTTTGTGGAAGGAG  
 AGATAGAAGAGAAGGGACCTTTCTTGAATTCTGCTTTCCCTTCTACCTCTGAGGGTGAAGT  
 GGGGTCTCAGCTGAGGTGAGGACACAGCTATCAGTGGGAACTGTGAAAACAACAGTTCAAGG  
 GACAAAGTACTAGTCCCAACAACCTGCAGCCTCTGGGGAATGATGTGGA AAAATGCT  
 CAGCAAGGACAAAGAAGGCCTCACCTCTCTGAGACAATGTCCCTGCTGTGAAGTGGTTC  
 ATCAGGCAACCCAGGAGCCCTATTAAGACT(TAATTA)CCCTAAGGCTAAGTAGAGTTGT  
 TGTGT(C)AAT)GAGCACTTCTGCAGACCTAGC ACCAGGCAAGTGT(TGGAAA)(TGCAG  
 CTTCAGCC)CCTCTGGC(CATCTG)CTGATCCACCC(TTAAT)GGGACAAACAGCAAAGTCCAG  
 GGGTCAGGGGGGGGGTGC)TTGGAC(TATAAA)GCTAGTGGGGATTGAGTAACCCAGGCC  
 TAAGTGACCAGCTACAGTCGGAAACCATCAGCAAGCAGGTATGTA CTCTCCAGGGTGGGCC  
 TGGCTTCCCAGTCAAGACTCCAGGGATTTGAGGGACGCTGTGGGCTCTTCTTACATGTA  
 CCTTTGCTAGCCTCAACCCTGACTATCTCCAGGTCATTGTTCCAACATGGCCCTGTGGATC  
 CGCTTCTGCCCTGCTGGCCCTGCTCATCTCTGGGAGCCCCGCCCTGCCAGGCTTTTGTG  
 AAACAGCACCTTTGTGGTTCTCACTTGGTGGAAAGCTCTTACCTGGTGTGTGGGGAGCGTGG  
 ATTCTTCTACACACCCATGTCCCGCCGGAAGTGGAGGACCCACAAG

**Figure S1** Location of the primer pairs used for ChIP, and CpGs sequenced for methylation analysis, in the genomic sequences of *Pdx1*, *Ins1* and *Ins2*

Black, proximal promoter; blue, 5' untranslated region; red, first exon. The sequences in parentheses indicate known regulatory elements. Primers for ChIP qPCR are highlighted in yellow. CGs shown in bold type were sequenced in the DNA methylation assay.

<sup>1</sup> To whom correspondence should be addressed (slack017@umn.edu).

**Table S1 Primer pairs used in RT-PCR, ChIP qPCR, DNA methylation analysis and qRT-PCR**

| Primer name                                  | Forward sequence (5'–3')      | Reverse sequence (5'–3')   |
|----------------------------------------------|-------------------------------|----------------------------|
| <b>Primers used in RT-PCR</b>                |                               |                            |
| Ins1                                         | CTACAATCATAGACCATCAGCA        | CAGTTGGTAGAGGGAGCAGAT      |
| Ins2                                         | CCCTGTGGATCCGCTTCCTGC         | GTGCCAAGGTCTGAAGGTCA       |
| Gcg                                          | GCTGGCAGCATGCCCTCAA           | CCTTTGCTGCCTGGCCCTCC       |
| Ppy                                          | CTATCCACTTGGGTGGCTCT          | ATCAAACCCACCAGAAAGGC       |
| Sst                                          | CCCAGACTCCGTCAGTTTCT          | GAAGTTCTGCAGCCAGCTT        |
| lapp                                         | GGCTGTAGTTCCTGAAGCTT          | AAGGTTGTTGCTGGAGCGAA       |
| Pax4                                         | TGGAGAAAGAGTTCAGCGT           | CTTGGGATGTGGTGTCACTG       |
| Neurod1                                      | TTTCAAACACGAACCATCCA          | CCTGTTTCTCCAAAGGCAG        |
| Nkx2.2                                       | CACGGCTCAAAGCCAGGA            | GGAGAGAGCGGTGGGGCAGA       |
| Arx                                          | AGGACGCCGAGGGCAAGGAT          | TCTCCCGCTTGCACCCTTG        |
| Pdx1                                         | GTAGTAGCGGGACAACGAGC          | CAGTTGGGAGCCTGATTCTC       |
| Ngn3                                         | AAACTTCGAAGCGAGCAGAG          | CATCCTGAGGTTGGGAAAA        |
| MafA                                         | TCCAGGCTGGTGCAGAAAG           | GCAAGCCCACTCAGGAGCCG       |
| Isl1                                         | TGATCGCGCCCGCTCTAAG           | TGACTCGGGGACTGAGGCGG       |
| Hlxb9                                        | CCTGTGCGACCCAAAGCGTT          | CCCAGCAGCTCCTCCTCCGT       |
| Pax6                                         | GGCCGTGCGACATTTCCCGA          | GCCGTCTGCGCCATCTGTT        |
| Hes1                                         | GGCCACCTGGCCAACTGCAT          | GCTGGAAGGCGCACTGCG         |
| Glut2                                        | GCCATCTTCTCTCTCGTCAAG         | ACCTGGTTCCTTCTGGTCT        |
| Kir6.2                                       | CTGGAAGGAAGCCAGTCTTG          | CAGTGTCCCCAGACAAAGT        |
| Sur1                                         | AGCTGCGCTTCTGCCTCACG          | GGCACCCCTGCTGGCTCTGTG      |
| Amylase                                      | GCCTACTGACAGAGCCCTTG          | TGGTCCAATCCAGTCAATCA       |
| Ptf1a                                        | CCTCTCCAAGGTAGACACGC          | CCTGGGATGTGGTGTCACTG       |
| Cbe                                          | GACCGCGGTACAGCTCGCG           | CTGCGCCCCACCGTGTAGAT       |
| Pcsk2                                        | ACACAGCTCCGCCAATTCGCA         | TGAGATCCACAACCCCTCCA       |
| Prss1                                        | GTGTATCTCCAACGATCTTGT         | CACCTTGATCCTAGCCCTTG       |
| Cpa1                                         | CCAGAAGTCCAACCTGCAAGT         | CAGTCTGTGGCAATGAGAAT       |
| Ctrb1                                        | GAATAGCATCTCTCCGTTGAC         | GTCCTGCTTTGCCCTTGT         |
| Rbpjl                                        | CATCTCCGAACACACCTTG           | CTCCAGTGCCTCATATCAGC       |
| Beta Actin                                   | TCCGTAAGACCTCTATGCC           | GGAGGGGCGGACTCATCGT        |
| mNgn3                                        | CCGGATGACGCCAAACTTACA         | ACACCAGTGTCTCCGGGAG        |
| mPdx1                                        | CCGGACATCTCCCATACGAAGT        | CGCACAACTTGTCTCCGGCTCT     |
| mMafA                                        | ATCATCACTCTGCCCAACAT          | AGTCGGATGACCTCCTCCTT       |
| <b>Primers used in ChIP qPCR</b>             |                               |                            |
| Ins1                                         | CCAATGAGCGCTTTCGCACTT         | AGGAGAGTACATACCTGCTGCTG    |
| Ins2                                         | ACCAGGCAAGTGTGGAACTGC         | ATGTAAGAGAAGAGCCACAGCGT    |
| Pdx1                                         | AGAGATCAGCTGCTGAGAGAGAA       | TACTGCTCCTCACTATTCATGGTGGC |
| Gapdh                                        | CTTTACGGGTGCACGTAGCTCA        | TTTCACTGGCACTGCACAAGAAG    |
| <b>Primers used in DNA methylation assay</b> |                               |                            |
| Ins1 1st set                                 | TTTTAGGTTAAGTAGAGTTGTTGA      | CCCTAAAATTTAACTAAAAAAC     |
| Ins1 2nd set                                 | GTTTTTGTTTTTGTGGTTTTGTT       | CACCCAACTCCAATTATAACACTTAC |
| Ins1 3rd set                                 | TTTTTGGGAGTTAAGTTTGTGTTAG     | ATACAACACTAATCCAAATACCAC   |
| Ins2 1st set                                 | TTTGAGTTTTTATTGTTTTTTTT       | CTAATTAATACTACCCTATTCCCC   |
| Ins2 2nd set                                 | GATTATAAAGTTAGTGGGATTTAGTAATT | TATTTAAACAAAACCTAAACAAAAC  |
| Ins2 3rd set                                 | GTATTTTTGTGGTTTTTATTGTTG      | ACTTACCTTATAAATCCTCCACTTC  |
| Pdx1 1st set                                 | AGGAGAGATTAGTTTGTGAGAGAGAA    | AAAAACTACAACAAAACCTTAAAC   |
| Pdx1 2nd set                                 | ATTATGAATAGTGGGAGTAGTATTA     | AAAAACTTCCCTATTCCAAC       |
| Pdx1 3rd set                                 | GTTGGAATAGGGAAGTTTTT          | ACTTACCTACCCTAACTTTTCCAC   |
| <b>Primers used in qPCR</b>                  |                               |                            |
| Ins1                                         | CAATCATAGACCATCAGCAAGC        | AGAAACCACGTTCCCCAC         |
| Ins2                                         | CCCAGGCTTTTGTCAAACAG          | GTGCCAAGGTCTGAAGGTC        |
| lapp                                         | CCACTGAAAGGGATCTTGAGAC        | TTCCGTTGTCCACCCTGAG        |
| Pax4                                         | GGGCAGTATCCAGATTCAGTTG        | GGCATCTGTGTTCCCATTTT       |
| Neurod1                                      | ATGTCTTCCACGTCAAGCC           | GAGAAGTTGCCAATGATGCTG      |
| Nkx2.2                                       | GGTCAAGACTCTGTTCCAAAAC        | GTCACCTCCATACCTTTCTCAG     |
| Arx                                          | AATCTAACCCATCCCAACAC          | CTCTTCTGGTACTGATTGCTC      |
| Endogenous Pdx1                              | CCCAGCTTCTGAAAACCTTG          | CITTTTATTGCTCAGTTGGG       |
| Endogenous Ngn3                              | TCCAGACGCAATTTACTCCAG         | CTAGTTCTCCGGGCTCAAAG       |
| Endogenous MafA                              | TCTTTCTGTGAGCGCGG             | TCAGAGTCCGAACCGAGG         |
| Isl1                                         | TTGTTAGGGACGGGAAAACC          | CTACACAGCGGAAACATTCG       |
| Hlxb9                                        | GCTTTCCTACTCGTATCCTCAG        | TTCCCAAGAGTTTCGATTG        |
| Hes1                                         | AGAAAAATCCTCGTCCCG            | TTTCATTTATTCTGCGCGG        |
| Glut2                                        | CACATCCTACTTGGCCTATCTG        | TCAGTGGCCCTTAGTCTTTT       |
| Kir6.2                                       | TCAGTAAGCAATGAGCAGGG          | CAACCTCTGGACTGATATGCC      |
| Sur1                                         | AGAAGCTCCTAGAGTACACCG         | TGTAGGGAGTTGGAGATGGAG      |
| Amylase                                      | GCAGACTTTCATTTTCCAAGAG        | ACAAAACCCCAACCTTCTCC       |
| Ptf1a                                        | AGGACCCAGAAAACCTCAAC          | CAATATGCACAAGACACAGCC      |
| Cbe                                          | ATGTAATGAGCGGTTGG             | AGGGCATGATATGATCTGTT       |

**Table S1 Continued**

| Primer name | Forward sequence (5'–3') | Reverse sequence (5'–3') |
|-------------|--------------------------|--------------------------|
| Pcsk1       | CTCAGCCCTTCCTACTTGTG     | CATTGACAACTGCCTCTTCG     |
| Pcsk2       | GCATAAAGACGGAGAGGAAGAG   | TGGTAAAAGTGGTACAGGCC     |
| Prss1       | GTGTATCCTCCAACGATCTTGT   | CACCTTGATCCTAGCCCTTG     |
| Cpa1        | CCAGAAGTCCAAGTCAAGT      | CAGTCTGTGGCAATGAGAAGT    |
| Cpb1        | CACGTTGCTTATCAGTACCTCA   | GCCTCTCACTACAGTTGACTT    |
| Ptrb1       | GAATAGCATCCTCTCCGTTGAC   | GTCCTGCTTTGCCCTTGT       |
| Rbpjl       | CATCTCCGAACCACACCTTG     | CTCCAGTGCCTCATATCAGC     |
| Gapdh       | TCCAGTATGACTCTACCCACG    | CACGACATACTCAGCACCAG     |

Received 15 September 2011/7 December 2011; accepted 9 December 2011  
 Published as BJ Immediate Publication 9 December 2011, doi:10.1042/BJ20111678
